# Supplementary material for: Are atmospheric PBDE levels declining in Central Europe?Examination of the seasonal variations, gas-particle partitioning andimplications for long-range atmospheric transport
Source: Copernicus journal article supplement (doi:10.5194/acp-2018-144), 2018-03-28
Supplement: Supplementary file 1 [file acp-2018-144-supplement.pdf]

## Table of Contents

### List of Tables

|                                                                                                                                                                     |    |
|---------------------------------------------------------------------------------------------------------------------------------------------------------------------|----|
| Table S1: Additional information about the air sampling performed.....                                                                                              | S2 |
| Table S2: Range of the limit of quantifications determined by the instrument and by the field blank concentrations plus three times their standard deviations ..... | S2 |
| Table S3: Results of breakthrough experiments for PBDEs. ....                                                                                                       | S2 |
| Table S4: Summary of the atmospheric concentrations and detections of individual PBDEs found in this study .....                                                    | S3 |
| Table S5: Results of the Pearson correlation analysis between the individual concentrations of PBDEs and different meteorological parameters. ....                  | S4 |
| Table S6: Results of correlation analysis between $\theta_{\text{measured}}$ and the inverse of temperature ( $\text{K}^{-1}$ ) for individual congeners.....       | S5 |
| Table S7: Results of correlation analysis between $\theta_{\text{measured}}$ and the precipitation rate for individual PBDEs. ....                                  | S5 |
| Table S8: Half lives of individual PBDEs observed in this study and elsewhere. ....                                                                                 | S6 |

### List of Figures

|                                                                                                                                             |     |
|---------------------------------------------------------------------------------------------------------------------------------------------|-----|
| Figure S1: Results of the breakthrough experiments for BDE47, BDE99, BDE183 and BDE209 .....                                                | S7  |
| Figure S2: Contribution of individual BDEs to $\Sigma_9$ PBDEs .....                                                                        | S7  |
| Figure S3: Correlation between the concentration of individual PBDEs with the inverse of temperature .....                                  | S9  |
| Figure S4: Selected examples of 5 days backward trajectories of samples associated with the lowest PBDE concentrations .....                | S10 |
| Figure S5: Selected examples of 5 days backward trajectories of samples associated with the highest PBDE concentrations .....               | S10 |
| Figure S6: Average particulate fraction and their standard deviations found in this study.....                                              | S11 |
| Figure S7: Comparison of measured and predicted $\theta$ .....                                                                              | S12 |
| Figure S8: Comparison of the predicted and measured $\log K_p$ (a) and $\theta$ (b) using the average conditions at the sampling site ..... | S13 |
| Figure S9: Schematic of the effect of an over- or under-estimation of $\log K_p$ by one order of magnitude in terms of $\theta$ .....       | S13 |
| Figure S10: Comparison of the measured particulate fractions of three sets of isomers. ....                                                 | S14 |
| Figure S11: Influence of $\log K_{\text{OA}}$ on measured $\log K_p$ for individual PBDEs .....                                             | S15 |

Table S1: Additional information about the air sampling performed

| Year | Sampled volume (min-max) | Number of samples | Number of samples excluded | Number of field blanks | Number of laboratory blanks | Time span covered |
|------|--------------------------|-------------------|----------------------------|------------------------|-----------------------------|-------------------|
| 2011 | 4512 ; 5863              | 40                | 9                          | 3                      | 2                           | 63%               |
| 2012 | 4015 ; 5864              | 26                | 1                          | 3                      | 2                           | 42%               |
| 2013 | 3753 ; 5480              | 23                | 3                          | 2                      | 3                           | 38%               |
| 2014 | 5236 ; 5597              | 25                | 0                          | 3                      | 4                           | 41%               |

Table S2: Range of the limit of quantifications (LOQs) determined by the instrument (iLOQ) and by the field blank concentrations plus three times their standard deviations (LOQ<sub>blanks</sub>). To calculate LOQs in  $\text{pg m}^{-3}$ , the average sample volume ( $V=5264 \text{ m}^3$ ) was used

|         | iLOQ (min-max) |                   | LOQ <sub>blanks</sub> (min-max) |                     |
|---------|----------------|-------------------|---------------------------------|---------------------|
|         | pg/sample      | pg/m <sup>3</sup> | pg/sample                       | pg/m <sup>3</sup>   |
| BDE 28  | 0.26 - 5486    | 4.92E-05 - 1.04   | 0 - 4.84                        | 0 - 9.19E-04        |
| BDE 47  | 0.11 - 2089    | 2.09E-05 - 0.40   | 8.30 - 129.7                    | 1.58E-03 - 2.46E-02 |
| BDE 66  | 0.15 - 1001    | 2.87E-05 - 0.19   | 0 - 3.59                        | 0 - 6.82E-04        |
| BDE 100 | 0.18 - 281     | 3.50E-05 - 0.05   | 0 - 277                         | 0 - 5.26E-02        |
| BDE 99  | 0.27 - 1238    | 5.07E-05 - 0.24   | 12.5 - 107                      | 2.37E-03 - 2.03E-02 |
| BDE 85  | 0.25 - 310     | 4.75E-05 - 0.06   | 0 - 0                           | 0 - 0               |
| BDE 154 | 0.26 - 246     | 4.84E-05 - 0.05   | 0 - 6.26                        | 0 - 1.19E-03        |
| BDE 153 | 0.29 - 382     | 5.57E-05 - 0.07   | 0 - 0                           | 0 - 0               |
| BDE 183 | 0.84 - 593     | 1.59E-04 - 0.11   | 0 - 32.5                        | 0 - 6.16E-03        |
| BDE 209 | 3.10 - 5374    | 5.90E-04 - 1.02   | 0 - 3031                        | 0 - 5.76E-01        |

Table S3: Results of breakthrough experiments for PBDEs. Only samples for which analytes were detected in at least one of the PUF were considered. N/D indicates compounds that were detected neither in the lower or upper PUF

| Compound | Frequency of detection on upper PUF | Frequency of detection on lower PUF | % of compound mass found on the lower PUF |       |         |                    |        |
|----------|-------------------------------------|-------------------------------------|-------------------------------------------|-------|---------|--------------------|--------|
|          |                                     |                                     | Min                                       | Max   | Average | Standard deviation | Median |
| BDE 28   | 100%                                | 50%                                 | 0.00                                      | 85.8  | 8.1     | 17.8               | 0.00   |
| BDE 47   | 100%                                | 100%                                | 3.30                                      | 26.3  | 12.7    | 6.5                | 13.6   |
| BDE 66   | 51.9%                               | 7.7%                                | 0.00                                      | 69.6  | 5.5     | 18.5               | 0.00   |
| BDE 100  | 100%                                | 96.2%                               | 0.00                                      | 52.8  | 15.5    | 10.8               | 17.6   |
| BDE 99   | 100%                                | 100%                                | 3.83                                      | 50.5  | 17.7    | 10.8               | 18.1   |
| BDE 85   | 22.2%                               | 0%                                  | 0.00                                      | 0.00  | 0.00    |                    | 0.0    |
| BDE 154  | 77.8%                               | 34.6%                               | 0.00                                      | 42.7  | 7.7     | 11.8               | 0.0    |
| BDE 153  | 63%                                 | 11.5%                               | 0.00                                      | 48.0  | 5.4     | 14.0               | 0.0    |
| BDE 183  | 88.9%                               | 73.1%                               | 0.00                                      | 100.0 | 31.9    | 29.3               | 29.9   |
| BDE 209  | 96.3%                               | 84.6%                               | 0.00                                      | 100.0 | 53.6    | 29.4               | 55.8   |

Table S4: Summary of the atmospheric concentrations (in  $\text{pg m}^{-3}$ ) and detections (in %) of individual PBDEs found in this study

|                      |           | BDE<br>28 | BDE<br>47 | BDE<br>66 | BDE<br>100 | BDE<br>99 | BDE<br>85 | BDE<br>154 | BDE<br>153 | BDE<br>183 | BDE<br>209 | $\Sigma_9$ PBD<br>Es |
|----------------------|-----------|-----------|-----------|-----------|------------|-----------|-----------|------------|------------|------------|------------|----------------------|
| Gas phase            | Detection | 97        | 99        | 62        | 75         | 92        | 32        | 87         | 66         | 90         | 41         | 100                  |
|                      | Min       | <LO<br>Q  | <LO<br>Q  | <LO<br>Q  | <LO<br>Q   | <LO<br>Q  | <LO<br>Q  | <LO<br>Q   | <LO<br>Q   | <LO<br>Q   | <LO<br>Q   | 0.022                |
|                      | Max       | 3.731     | 1.218     | 0.198     | 0.185      | 0.570     | 0.016     | 0.040      | 0.054      | 0.482      | 5.010      | 5.858                |
|                      | Average   | 0.051     | 0.141     | 0.011     | 0.022      | 0.071     | 0.003     | 0.007      | 0.007      | 0.023      | 0.513      | 0.311                |
|                      | SD        | 0.360     | 0.152     | 0.024     | 0.026      | 0.078     | 0.003     | 0.006      | 0.009      | 0.065      | 1.076      | 0.583                |
| Particulate<br>phase | Detection | 51        | 82        | 43        | 89         | 99        | 25        | 90         | 82         | 96         | 79         | 99                   |
|                      | Min       | <LO<br>Q  | <LO<br>Q  | <LO<br>Q  | <LO<br>Q   | <LO<br>Q  | <LO<br>Q  | <LO<br>Q   | <LO<br>Q   | <LO<br>Q   | <LO<br>Q   | <LOQ                 |
|                      | Max       | 0.036     | 0.312     | 0.104     | 0.111      | 0.424     | 0.039     | 0.152      | 0.142      | 0.367      | 0.685      | 1.380                |
|                      | Average   | 0.004     | 0.043     | 0.017     | 0.017      | 0.071     | 0.006     | 0.023      | 0.028      | 0.059      | 0.257      | 0.232                |
|                      | SD        | 0.006     | 0.054     | 0.021     | 0.020      | 0.082     | 0.008     | 0.029      | 0.030      | 0.069      | 0.142      | 0.285                |
| Total                | Detection | 98        | 100       | 68        | 100        | 100       | 40        | 100        | 91         | 99         | 89         | 100                  |
|                      | Min       | <LO<br>Q  | 0.038     | <LO<br>Q  | 0.001      | 0.025     | <LO<br>Q  | 0.003      | <LO<br>Q   | <LO<br>Q   | <LO<br>Q   | 0.088                |
|                      | Max       | 3.731     | 1.251     | 0.198     | 0.205      | 0.650     | 0.039     | 0.152      | 0.142      | 0.512      | 5.010      | 6.079                |
|                      | Average   | 0.053     | 0.175     | 0.020     | 0.031      | 0.135     | 0.006     | 0.027      | 0.030      | 0.078      | 0.468      | 0.542                |
|                      | SD        | 0.359     | 0.151     | 0.028     | 0.028      | 0.098     | 0.006     | 0.027      | 0.029      | 0.087      | 0.744      | 0.617                |

Table S5: Results of the Pearson correlation analysis (r) between the individual concentrations of PBDEs and different meteorological parameters. Numbers in bold indicates cases significant at the 99% confidence interval

|                  |                | BDE 28       | BDE 47       | BDE 66       | BDE 100      | BDE 99       | BDE 85       | BDE 154      | BDE 153      | BDE 183      | BDE 209      |
|------------------|----------------|--------------|--------------|--------------|--------------|--------------|--------------|--------------|--------------|--------------|--------------|
| C <sub>tot</sub> | precipitation  | -0.03        | 0.04         | -0.07        | -0.10        | -0.16        | 0.05         | <b>-0.32</b> | <b>-0.33</b> | <b>-0.26</b> | -0.08        |
|                  | wind direction | 0.04         | -0.07        | -0.07        | -0.20        | <b>-0.27</b> | -0.08        | <b>-0.36</b> | <b>-0.39</b> | <b>-0.31</b> | 0.03         |
|                  | wind speed     | -0.01        | <b>-0.30</b> | -0.24        | -0.23        | <b>-0.28</b> | -0.16        | -0.21        | -0.18        | -0.11        | 0.06         |
|                  | RH             | 0.00         | -0.18        | 0.14         | 0.06         | 0.07         | 0.14         | <b>0.34</b>  | <b>0.45</b>  | <b>0.26</b>  | 0.03         |
|                  | 1/T            | -0.12        | <b>-0.25</b> | <b>0.29</b>  | 0.08         | 0.15         | 0.13         | <b>0.58</b>  | <b>0.53</b>  | <b>0.27</b>  | -0.04        |
|                  | hmix           | 0.03         | -0.08        | -0.21        | <b>-0.31</b> | <b>-0.37</b> | -0.15        | <b>-0.53</b> | <b>-0.56</b> | <b>-0.39</b> | -0.03        |
| C <sub>g</sub>   | precipitation  | -0.02        | 0.10         | 0.08         | 0.13         | 0.15         | 0.20         | 0.12         | 0.09         | 0.02         | 0.00         |
|                  | wind direction | 0.04         | 0.01         | 0.12         | 0.03         | -0.01        | 0.04         | -0.01        | 0.03         | 0.01         | 0.09         |
|                  | wind speed     | -0.01        | -0.23        | -0.17        | -0.15        | -0.20        | <b>-0.26</b> | <b>-0.24</b> | -0.12        | 0.02         | 0.11         |
|                  | RH             | -0.01        | <b>-0.31</b> | -0.14        | <b>-0.28</b> | <b>-0.38</b> | <b>-0.28</b> | <b>-0.38</b> | -0.17        | -0.09        | 0.02         |
|                  | 1/T            | -0.13        | <b>-0.46</b> | -0.13        | <b>-0.47</b> | <b>-0.58</b> | <b>-0.43</b> | <b>-0.59</b> | <b>-0.51</b> | <b>-0.28</b> | -0.13        |
|                  | hmix           | 0.04         | 0.08         | 0.06         | 0.07         | 0.11         | 0.09         | 0.14         | 0.09         | 0.06         | 0.05         |
| C <sub>p</sub>   | precipitation  | -0.06        | -0.20        | -0.20        | <b>-0.31</b> | <b>-0.34</b> | -0.06        | <b>-0.34</b> | <b>-0.35</b> | <b>-0.35</b> | <b>-0.34</b> |
|                  | wind direction | -0.18        | <b>-0.26</b> | <b>-0.25</b> | <b>-0.33</b> | <b>-0.31</b> | -0.11        | <b>-0.35</b> | <b>-0.39</b> | <b>-0.40</b> | <b>-0.27</b> |
|                  | wind speed     | -0.17        | -0.19        | -0.16        | -0.13        | -0.15        | -0.03        | -0.15        | -0.14        | -0.16        | -0.22        |
|                  | RH             | 0.29         | <b>0.40</b>  | <b>0.39</b>  | <b>0.44</b>  | <b>0.44</b>  | <b>0.31</b>  | <b>0.42</b>  | <b>0.48</b>  | <b>0.41</b>  | 0.04         |
|                  | 1/T            | <b>0.42</b>  | <b>0.61</b>  | <b>0.61</b>  | <b>0.71</b>  | <b>0.72</b>  | <b>0.37</b>  | <b>0.69</b>  | <b>0.66</b>  | <b>0.60</b>  | <b>0.41</b>  |
|                  | hmix           | <b>-0.30</b> | <b>-0.48</b> | <b>-0.41</b> | <b>-0.52</b> | <b>-0.55</b> | -0.22        | <b>-0.54</b> | <b>-0.57</b> | <b>-0.55</b> | <b>-0.33</b> |

Table S6: Results of correlation analysis between  $\theta_{\text{measured}}$  and the inverse of temperature ( $\text{K}^{-1}$ ) for individual congeners. Numbers in bold indicate cases for which correlation were statistically significant ( $p < 0.05$ )

|           | BDE 28      | BDE 47      | BDE 66      | BDE 100     | BDE 99      | BDE 85      | BDE 154     | BDE 153     | BDE 183     | BDE 209     |
|-----------|-------------|-------------|-------------|-------------|-------------|-------------|-------------|-------------|-------------|-------------|
| r2        | <b>0.31</b> | <b>0.74</b> | <b>0.57</b> | <b>0.54</b> | <b>0.84</b> | <b>0.51</b> | <b>0.76</b> | <b>0.61</b> | <b>0.49</b> | <b>0.06</b> |
| slope     | 1125.97     | 2296.02     | 3144.01     | 3137.97     | 3391.30     | 2919.25     | 3342.59     | 2927.09     | 2033.25     | 925.10      |
| intercept | -3.89       | -7.92       | -10.81      | -10.63      | -11.55      | -9.92       | -11.25      | -9.72       | -6.51       | -2.55       |

Table S7: Results of correlation analysis between  $\theta_{\text{measured}}$  and the precipitation rate for individual PBDEs. Numbers in bold indicate cases for which the correlations were statistically significant ( $p < 0.05$ )

|                    | BDE 28      | BDE 47      | BDE 66      | BDE 100     | BDE 99      | BDE 85      | BDE 154     | BDE 153     | BDE 183     | BDE 209 |
|--------------------|-------------|-------------|-------------|-------------|-------------|-------------|-------------|-------------|-------------|---------|
| precipitation rate | <b>0.05</b> | <b>0.11</b> | <b>0.11</b> | <b>0.08</b> | <b>0.15</b> | 0.06        | <b>0.18</b> | <b>0.14</b> | <b>0.10</b> | 0.03    |
| RH                 | <b>0.13</b> | <b>0.31</b> | <b>0.32</b> | <b>0.25</b> | <b>0.38</b> | <b>0.30</b> | <b>0.31</b> | <b>0.27</b> | <b>0.14</b> | 0.02    |

Table S8: Half lives of individual PBDEs observed in this study and elsewhere. Compounds in bold represent the cases which were statistically significant at the 95% confidence interval.

| Reference            | This study                    |                            |             |                 | Schuster et al; 2010              | Birgul et al; 2012   |                |           | Ma et al; 2013            |                |                |             |                   |
|----------------------|-------------------------------|----------------------------|-------------|-----------------|-----------------------------------|----------------------|----------------|-----------|---------------------------|----------------|----------------|-------------|-------------------|
|                      | Kosetice, CZ, background site |                            |             |                 | UK and Norwegian background sites | London, UK           | Manchester, UK | HAZ, UK   | Chicago, USA              | Cleveland, USA | St. Point, USA | S.B.D., USA | Eagle Harbor, USA |
| Years                | 2011-2014                     |                            |             |                 | 2000-2008                         | 2002-2010            | 2003-2010      | 2000-2010 | 2005-2011                 |                |                |             |                   |
|                      | N                             | Half-life                  | r2          | p               | Half-life ± SD                    | Half-lives (min-max) |                |           | Half-lives (gas/particle) |                |                |             |                   |
| BDE 28               | 112                           | -7.37                      | 0.01        | 0.22            |                                   |                      |                |           |                           |                |                |             |                   |
| BDE 47               | 114                           | 22.77                      | 0           | 0.38            | 2.4 ± 0.2                         |                      |                |           | 5.2/5.3                   | 8.9/9.2        | -9.4/ns        | -7/ns       | -7.4/ns           |
| BDE 66               | 77                            | -4.89                      | 0.03        | 0.15            |                                   |                      |                |           |                           |                |                |             |                   |
| <b>BDE 100</b>       | <b>114</b>                    | <b>2.83 (1.87 ; 6.82)</b>  | <b>0.1</b>  | <b>&lt;0.01</b> | 4.0 ± 0.4                         |                      |                |           |                           |                |                |             |                   |
| <b>BDE 99</b>        | <b>114</b>                    | <b>3.61 (2.44 ; 7.33)</b>  | <b>0.12</b> | <b>&lt;0.01</b> | 3.3 ± 0.3                         |                      |                |           | -9.5/10.1                 | ns/9.1         | -4.6/ns        | -4.3/ns     | -4.7/ns           |
| BDE 85               | 46                            | 2.81                       | 0.07        | 0.08            |                                   |                      |                |           |                           |                |                |             |                   |
| BDE 154              | 114                           | 7.91                       | 0.01        | 0.21            | 3.3 ± 0.1                         |                      |                |           |                           |                |                |             |                   |
| <b>BDE 153</b>       | <b>104</b>                    | <b>4.52 (2.33 ; 71.74)</b> | <b>0.04</b> | <b>0.04</b>     | 1.4 ± 0.3                         |                      |                |           |                           |                |                |             |                   |
| BDE 183              | 113                           | 10.05                      | 0.01        | 0.36            |                                   |                      |                |           |                           |                |                |             |                   |
| <b>BDE 209</b>       | <b>101</b>                    | <b>2.58 (1.79 ; 4.58)</b>  | <b>0.17</b> | <b>&lt;0.01</b> |                                   |                      |                |           |                           | 2.6/5.3        | ns/8.5         |             |                   |
| Σ <sub>9</sub> PBDEs | 114                           | 9.16                       | 0.02        | 0.12            |                                   |                      |                |           |                           |                |                |             |                   |
| ΣPBDEs               |                               |                            |             |                 |                                   | 3.4 (2.2-6.9)        | 2.0 (1.3-4.6)  | 2.2-9.0   |                           |                |                |             |                   |

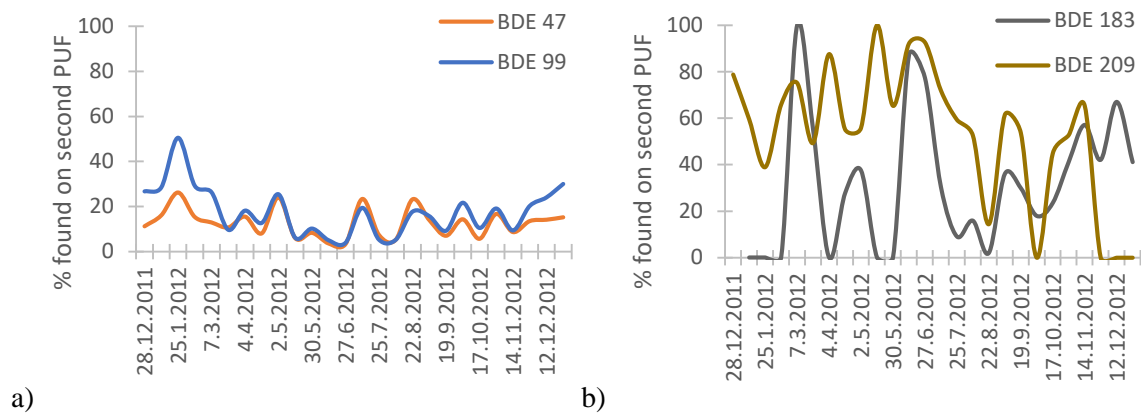

Figure S1: Results of the breakthrough experiments for BDE47, BDE99 (a), BDE183 and BDE209 (b)

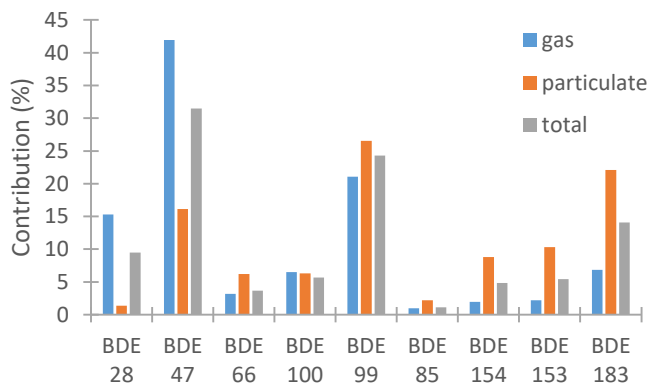

Figure S2: Contribution of individual BDEs to Σ<sub>9</sub>PBDEs

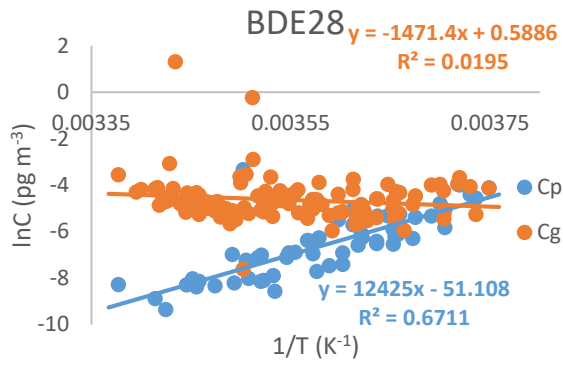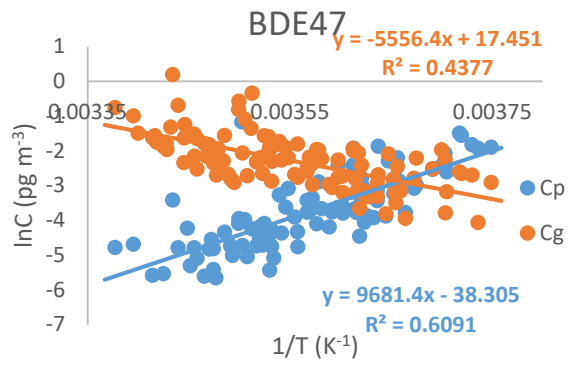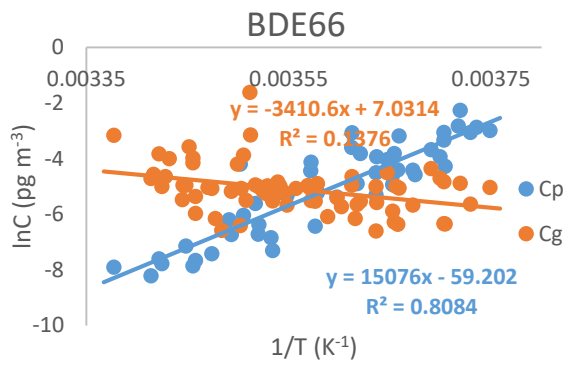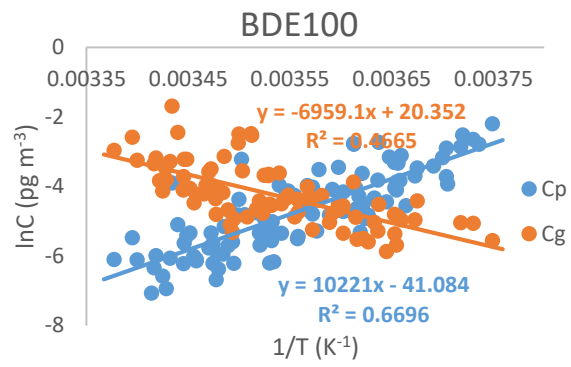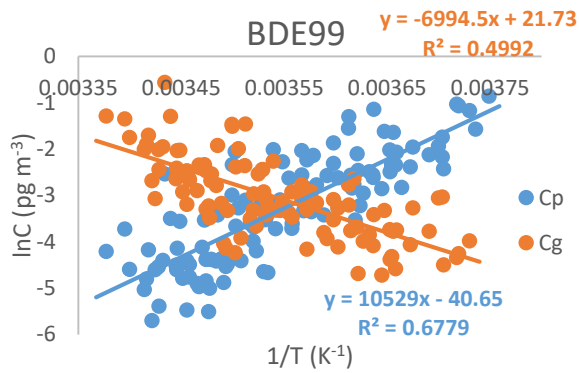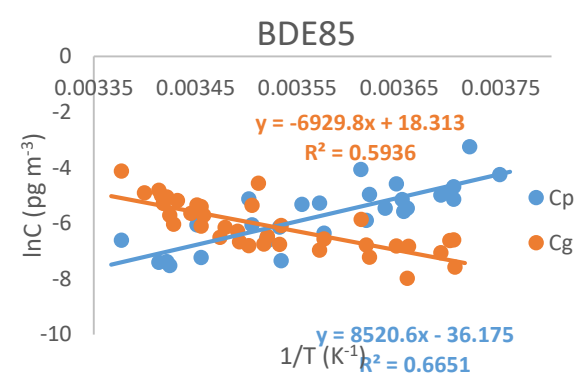



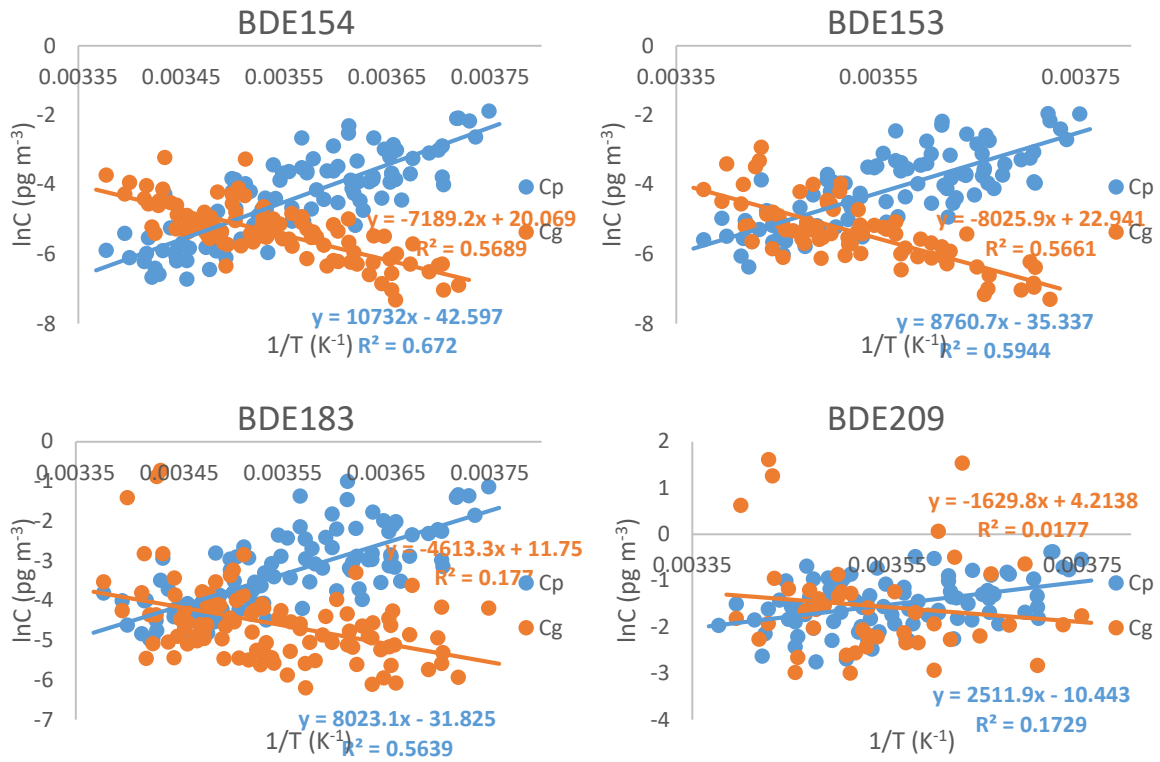

Figure S3: Correlation between the concentration of individual PBDEs (ln transformed) with the inverse of temperature

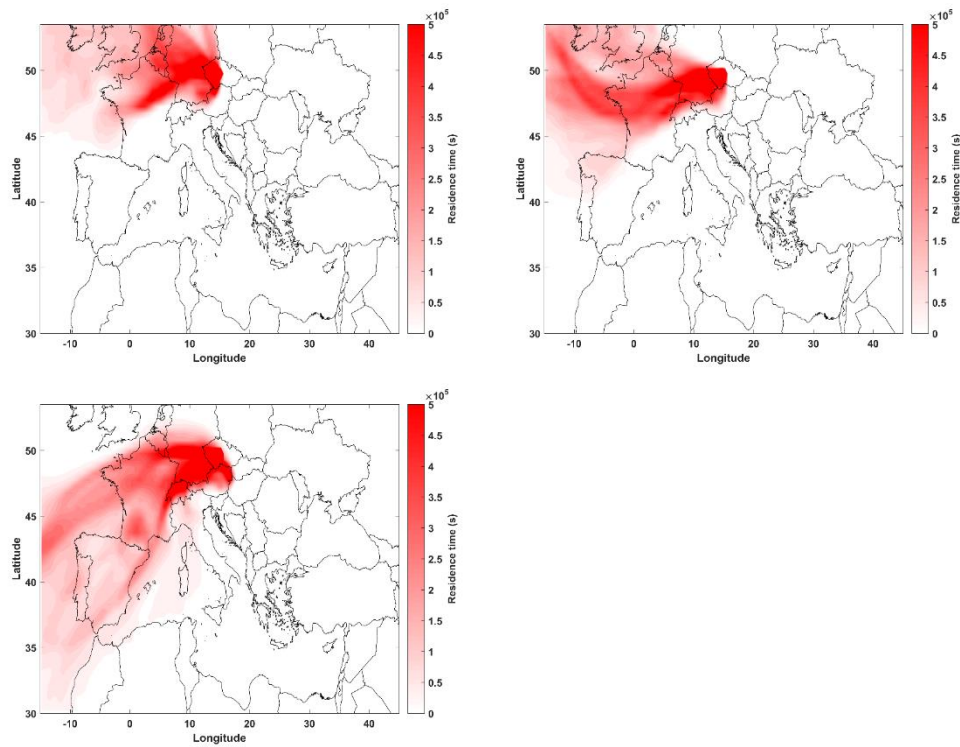

Figure S4: Selected examples of 5 days backward trajectories of samples associated with the lowest PBDE concentrations

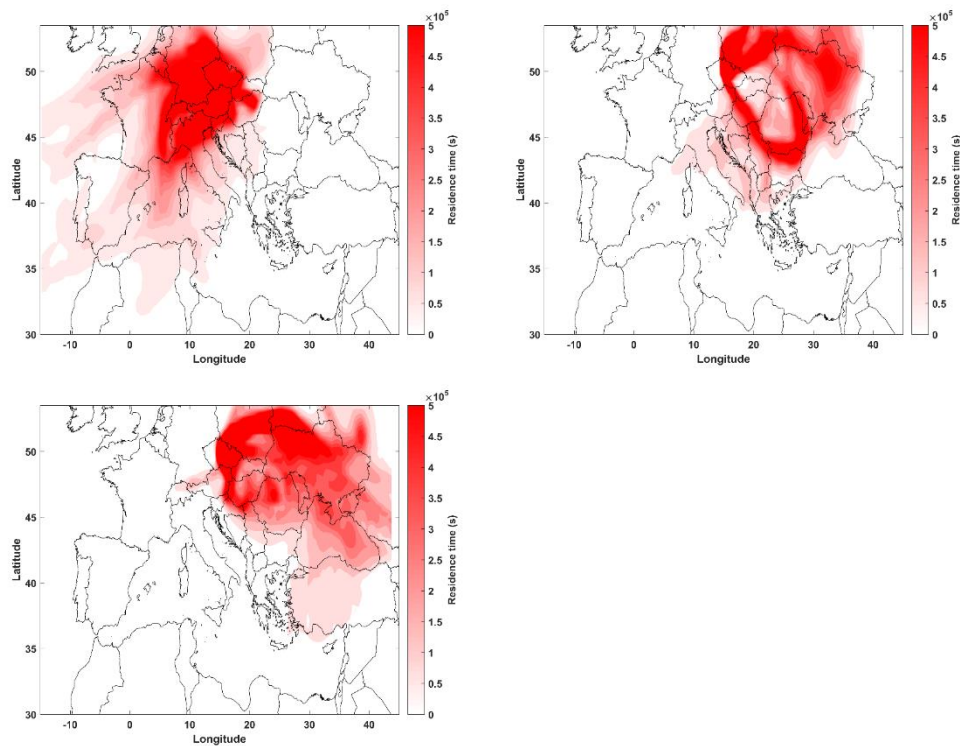

Figure S5: Selected examples of 5 days backward trajectories of samples associated with the highest PBDE concentrations

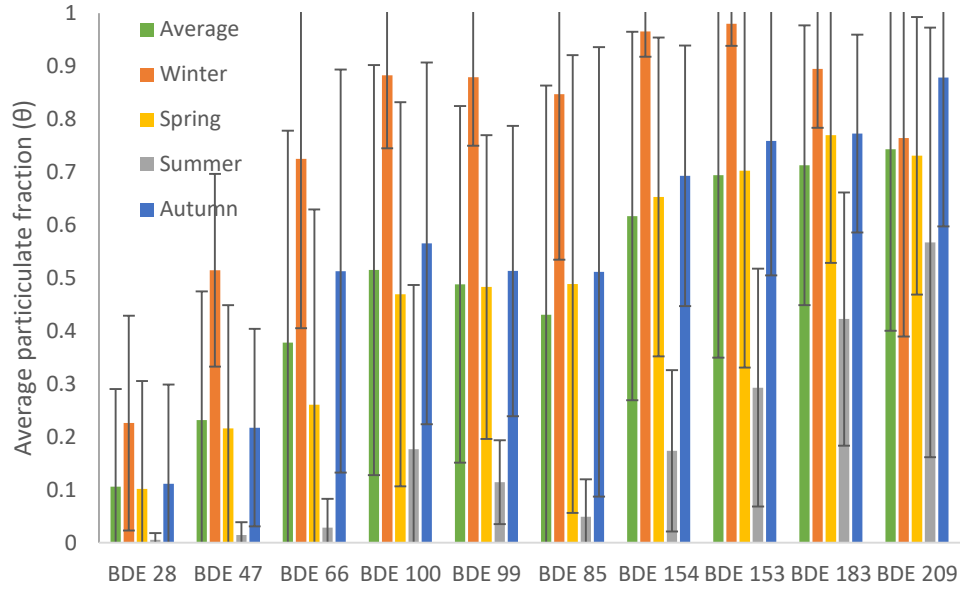

Figure S6: Average measured particulate fraction ( $\theta_{\text{measured}}$ ) found in this study

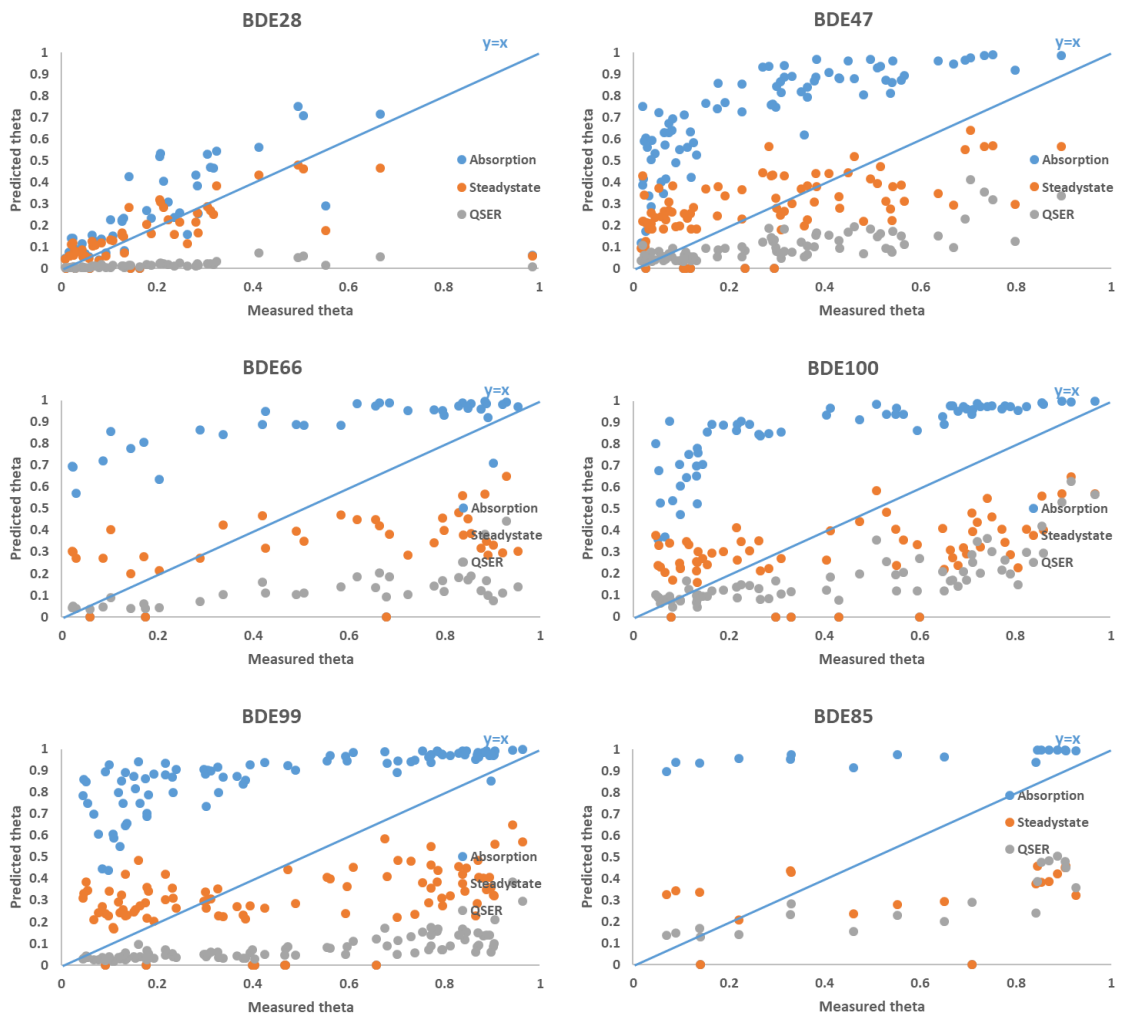

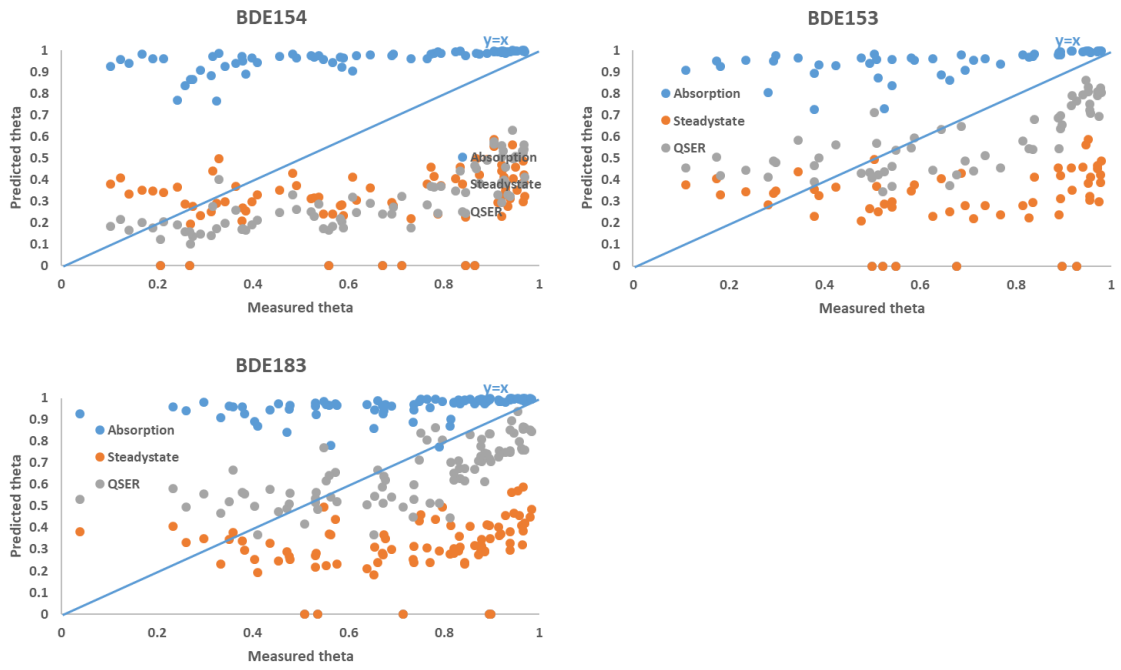

Figure S7: Comparison of measured and predicted  $\theta$

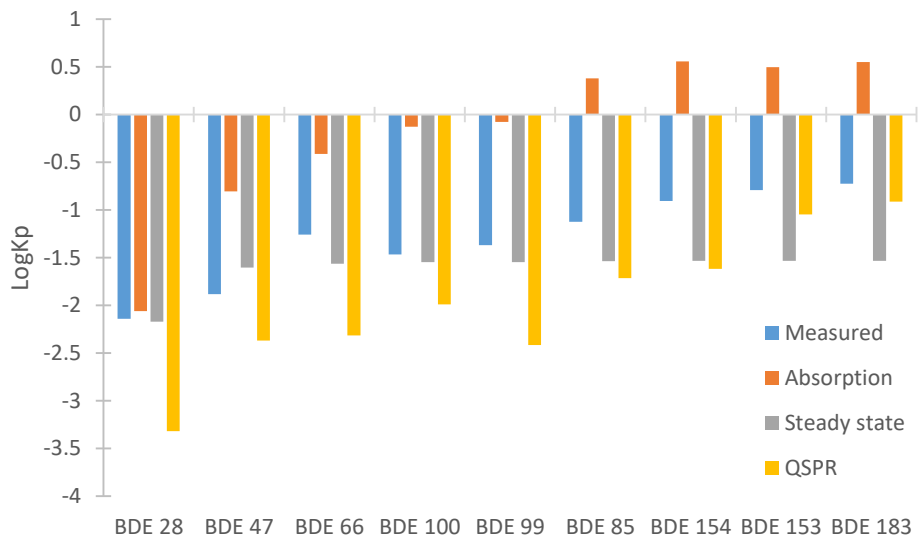

a)

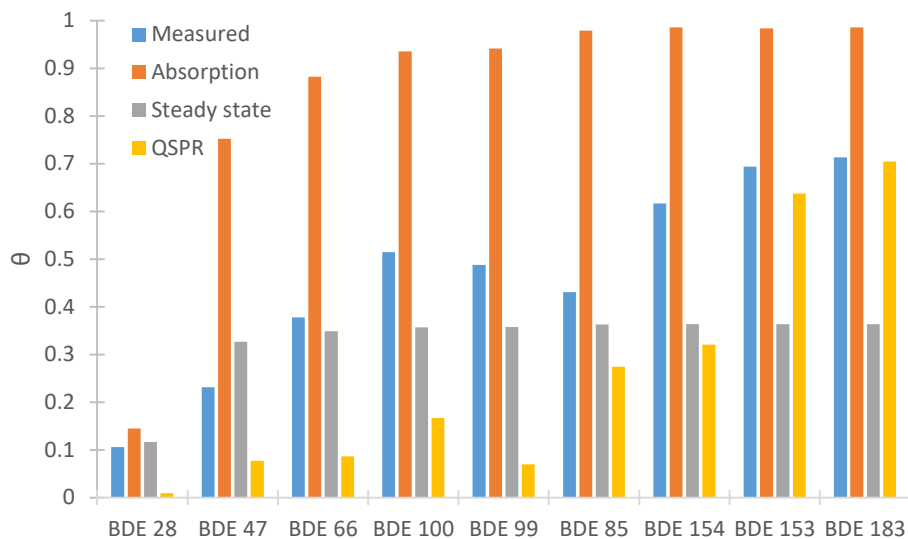

b)

Figure S8: Comparison of the predicted and measured  $\log K_p$  (a) and  $\theta$  (b) using the average conditions at the sampling site (i.e.  $T=281.8$  K,  $PM_{10}=19.6 \mu\text{g}\cdot\text{m}^{-3}$ )

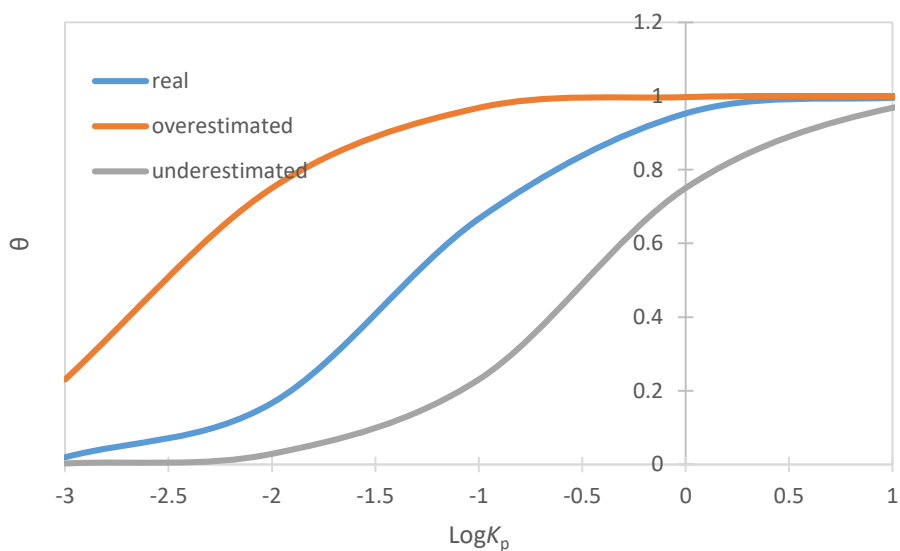

Figure S9: Schematic of the effect of an over- or under-estimation of  $K_p$  by one order of magnitude in terms of  $\theta$ . The average  $PM_{10}$  concentrations ( $19.6 \mu\text{g}\cdot\text{m}^{-3}$ ) at the sampling site during this study was used.

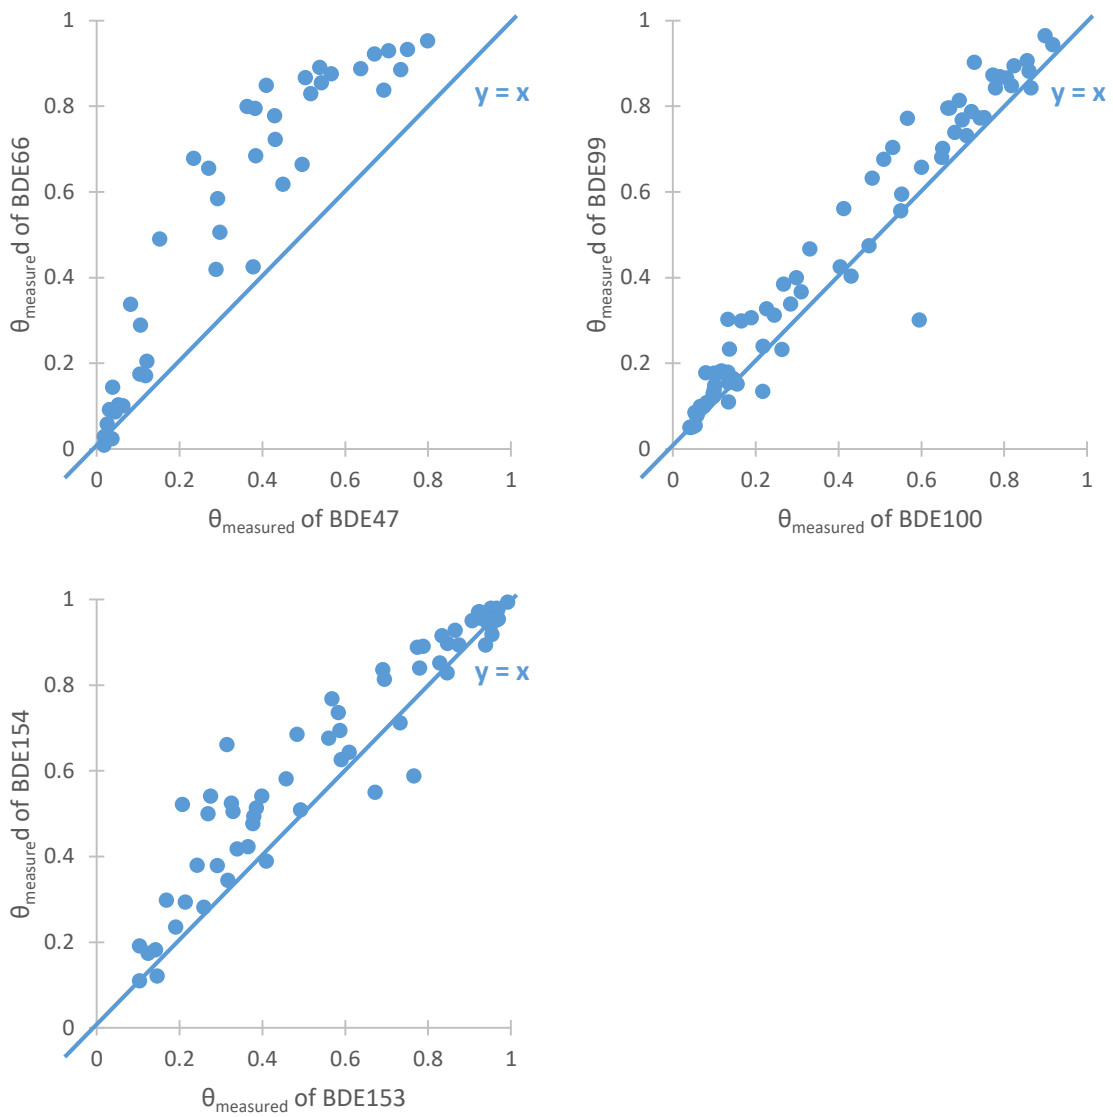

Figure S10: Comparison of the measured particulate fractions ( $\theta_{\text{measured}}$ ) of three sets of isomers. Cases when each isomers were detected in both the gaseous and particulate phases were considered

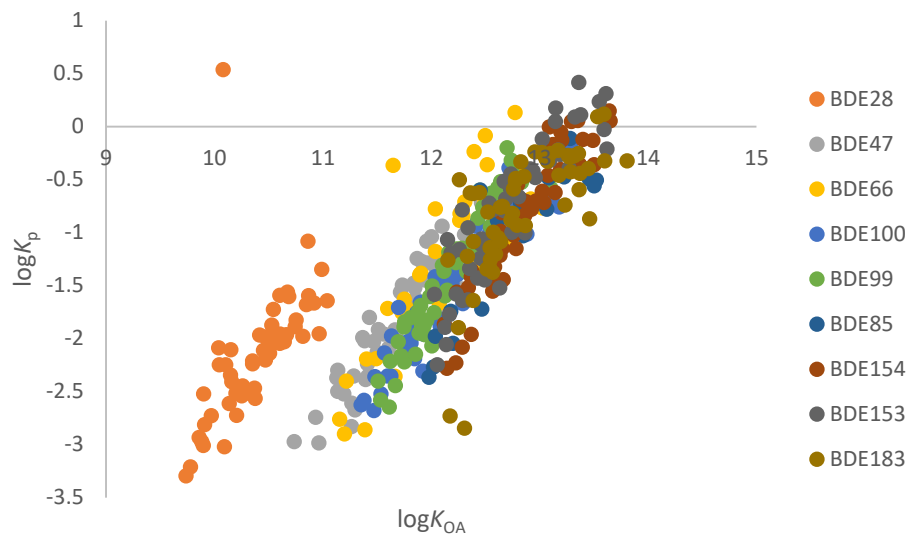

Figure S11: Influence of  $\log K_{OA}$  on measured  $\log K_p$  for individual PBDEs

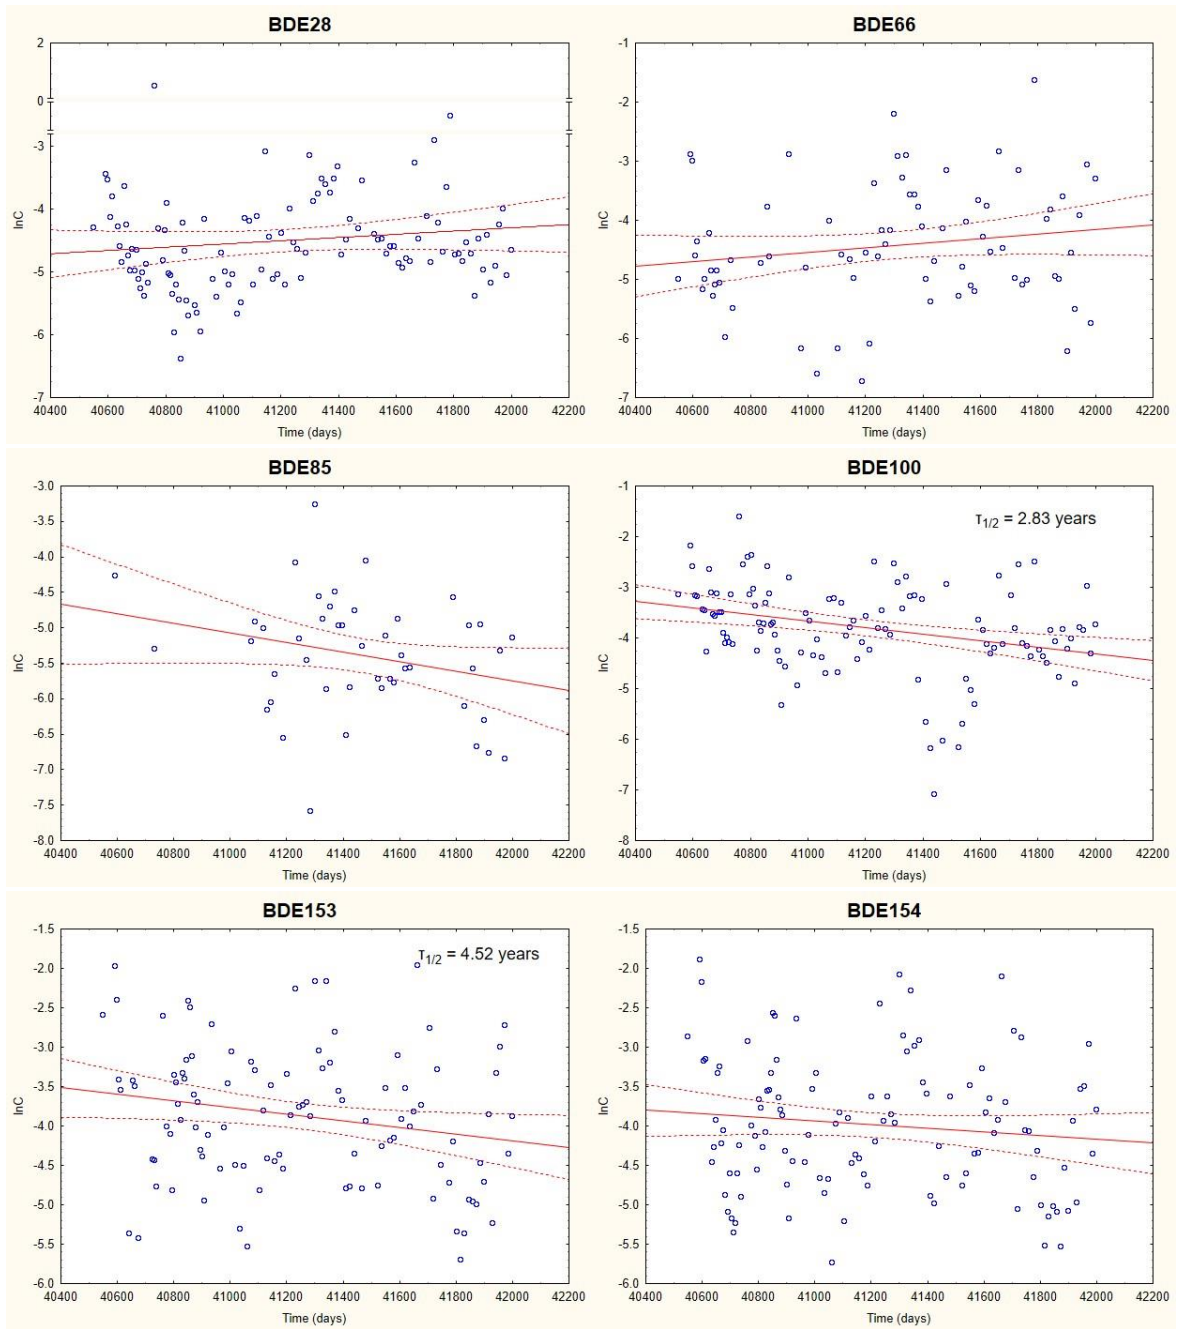

Figure S12: Multi-years trend of some PBDEs
